# Supplementary material for: First principles investigation of electron mobility enhancement of β-Ga2O3 doped with indium
Source: Royal Society of Chemistry journal article supplement (doi:10.1039/d4cp04220d), 2025-01-01
Supplement: d4cp04220d1.pdf [file d4cp04220d1.pdf]

## Supplementary: First principles investigation of electron mobility enhancement of $\beta$ -Ga<sub>2</sub>O<sub>3</sub> doped with Indium

Leng Zhang<sup>1,2</sup>, Jiajian Huang<sup>2</sup>, Fei Liu<sup>2</sup>, Pengzhan Zhang<sup>2</sup>, Danbei Wang<sup>2</sup>, Kongping Wu<sup>2</sup>, Yaowei Wei<sup>3</sup>

<sup>1</sup> National Laboratory of Solid State Microstructures and School of Physics, Nanjing University, Nanjing 210093, China

<sup>2</sup> School of Electronics and Information Engineering, Jinling Institute of Technology, Nanjing 211169, Jiangsu, P. R. China

<sup>3</sup> State Center for International Cooperation on Designer Low-Carbon & Environmental Materials (CDLCEM), School of Materials Science and Engineering, Zhengzhou University, Zhengzhou 450001, China

\* Corresponding author. E-mail address: [zhangleng2018@jit.edu.cn](mailto:zhangleng2018@jit.edu.cn)

Table S1 the detailed TDOS of Ga<sub>2</sub>O<sub>3</sub> and In-Ga<sub>2</sub>O<sub>3</sub> near the CBM

| Ga <sub>2</sub> O <sub>3</sub> |            | In-Ga <sub>2</sub> O <sub>3</sub> |            |
|--------------------------------|------------|-----------------------------------|------------|
| Energy(eV)                     | TDOS(1/eV) | Energy(eV)                        | TDOS(1/eV) |
| 1.7874                         | 0          | 1.7479                            | 0          |
| 1.8564                         | 0          | 1.8169                            | 0          |
| 1.9254                         | 0          | 1.8849                            | 0          |
| 1.9954                         | 0.00000096 | 1.9539                            | 0.0005415  |
| 2.0644                         | 0.01676    | 2.0219                            | 0.009534   |
| 2.1334                         | 0.06654    | 2.0909                            | 0.02959    |
| 2.2034                         | 0.1449     | 2.1589                            | 0.06071    |
| 2.2724                         | 0.1986     | 2.2279                            | 0.1029     |
| 2.3424                         | 0.2232     | 2.2959                            | 0.1561     |
| 2.4114                         | 0.2561     | 2.3649                            | 0.2226     |
| 2.4804                         | 0.2997     | 2.4329                            | 0.3246     |
| 2.5504                         | 0.3488     | 2.5019                            | 0.4201     |
| 2.6194                         | 0.4043     | 2.5709                            | 0.4963     |
| 2.6894                         | 0.494      | 2.6389                            | 0.549      |

|        |        |        |        |
|--------|--------|--------|--------|
| 2.7584 | 0.5401 | 2.7079 | 0.5776 |
| 2.8274 | 0.5584 | 2.7759 | 0.586  |
| 2.8974 | 0.568  | 2.8449 | 0.5851 |

---

The matrix of elastic constants  $C_{ij}$  (GPa) of pure  $\text{Ga}_2\text{O}_3$  (in GPa)

[288.4, 140.2, 171.7, 0, 0, -20.6]

[140.2, 412.6, 123.4, 0, 0, 7.6]

[171.7, 123.4, 401.7, 0, 0, 6.5]

[0, 0, 0, 108.5, 20.4, 0]

[0, 0, 0, 20.4, 82.4, 0]

[-20.6, 7.6, 6.5, 0, 0, 83.2]

The matrix of elastic constants  $C_{ij}$  (GPa) of In- $\text{Ga}_2\text{O}_3$  (in GPa)

[281.8, 130.1, 164.2, 0, 0, -20.2]

[139.1, 403.9, 122.3, 0, 0, 4.7]

[164.2, 122.3, 385.2, 0, 0, 1.7]

[0, 0, 0, 103.1, 18.0, 0]

[0, 0, 0, 18.0, 81.0, 0]

[-20.2, 4.7, 1.7, 0, 0, 75.4]

The matrix of elastic constants  $C_{ij}$  (GPa) of Al- $\text{Ga}_2\text{O}_3$  (in GPa)

[295.8, 143.2, 170.1, 0, 0, -20.3]

[143.2, 419.0, 123.0, 0, 0, 8.1]

[170.1, 123.0, 406.5, 0, 0, 7.3]

[0, 0, 0, 110.7, 19.8, 0]

[0, 0, 0, 19.8, 83.6, 0]

[-20.3, 8.1, 7.3, 0, 0, 84.9]

The matrix of deformation potential of  $\text{Ga}_2\text{O}_3$  (in eV)

[[3.15 0.19 0.12]  
 [0.19 2.16 0.01]  
 [0.12 0.01 3.27]]

The matrix of deformation potential of In-Ga<sub>2</sub>O<sub>3</sub> (in eV)

[[2.88 0.20 0.12]  
 [0.20 2.17 0.02]  
 [0.12 0.02 2.93]]

The matrix of deformation potential of Al-Ga<sub>2</sub>O<sub>3</sub> (in eV)

[[3.29 0.21 0.17]  
 [0.21 2.36 0.00]  
 [0.17 0.00 3.30]]

Table S2. Calculated Frohlich Parameter ( $\alpha$ ) and Schultz Polaron Radius ( $r_f$ ) for Electrons in Ga<sub>2</sub>O<sub>3</sub>, Al-Ga<sub>2</sub>O<sub>3</sub>, In-Ga<sub>2</sub>O<sub>3</sub> at T=300K

|         | $\alpha$          |                                |                                | $r_f$ (Å)         |                                |                                |
|---------|-------------------|--------------------------------|--------------------------------|-------------------|--------------------------------|--------------------------------|
|         | Ga <sub>2</sub> O | Al-                            | In-                            | Ga <sub>2</sub> O | Al-                            | In-                            |
|         | <sub>3</sub>      | Ga <sub>2</sub> O <sub>3</sub> | Ga <sub>2</sub> O <sub>3</sub> | <sub>3</sub>      | Ga <sub>2</sub> O <sub>3</sub> | Ga <sub>2</sub> O <sub>3</sub> |
| average | 1.16              | 1.25                           | 1.17                           | 145.8             | 138.1                          | 142.3                          |
| x       | 1.12              | 1.23                           | 1.14                           | 148.9             | 139.0                          | 144.2                          |
| y       | 1.07              | 1.15                           | 1.05                           | 154.0             | 144.0                          | 149.7                          |
| z       | 1.25              | 1.32                           | 1.26                           | 141.1             | 133.9                          | 136.8                          |
